# Supplementary material for: Preventive Effects of Collagen-Derived Dipeptide Prolyl-Hydroxyproline against Dexamethasone-Induced Muscle Atrophy in Mouse C2C12 Skeletal Myotubes
Source: MDPI journal article supplement (doi:10.3390/biom13111617), 2023-11-05

Figure 3A atrogin-1

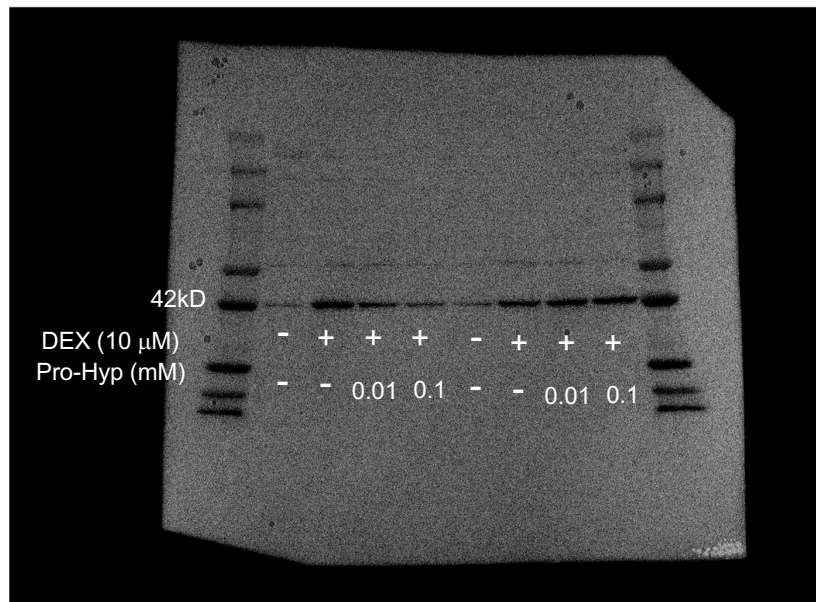

Figure 3A atrogin-1

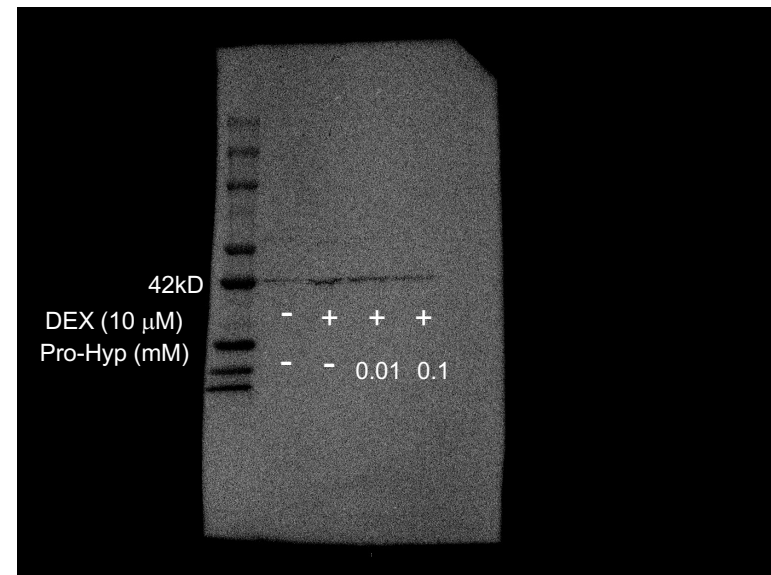

**Figure 3A MuRF-1**

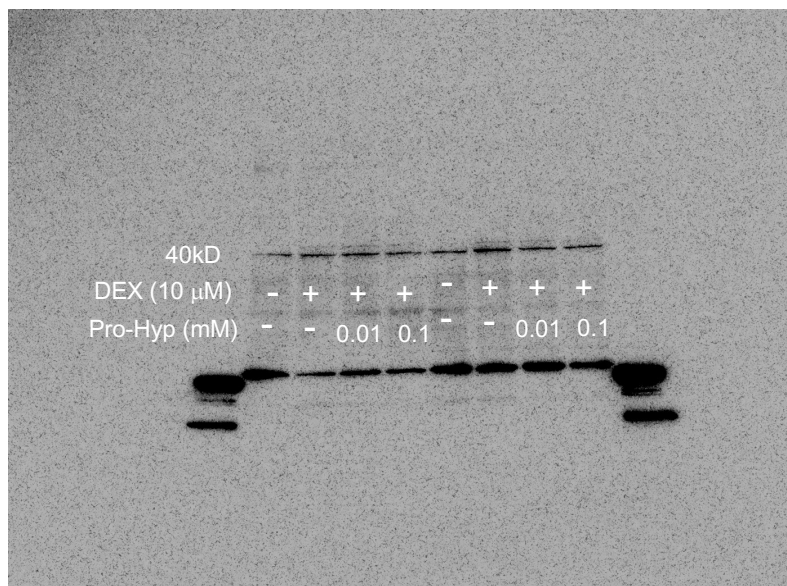

**Figure 3A MuRF-1**

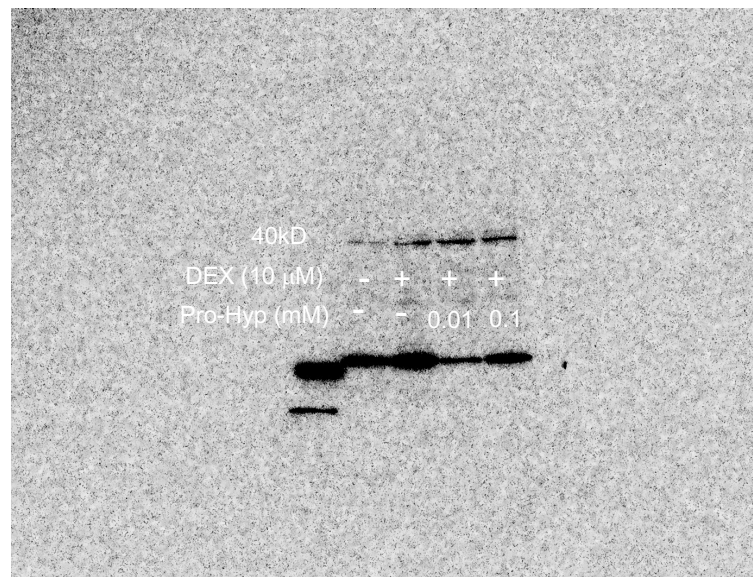

**Figure 3A Ubiquitinated proteins**

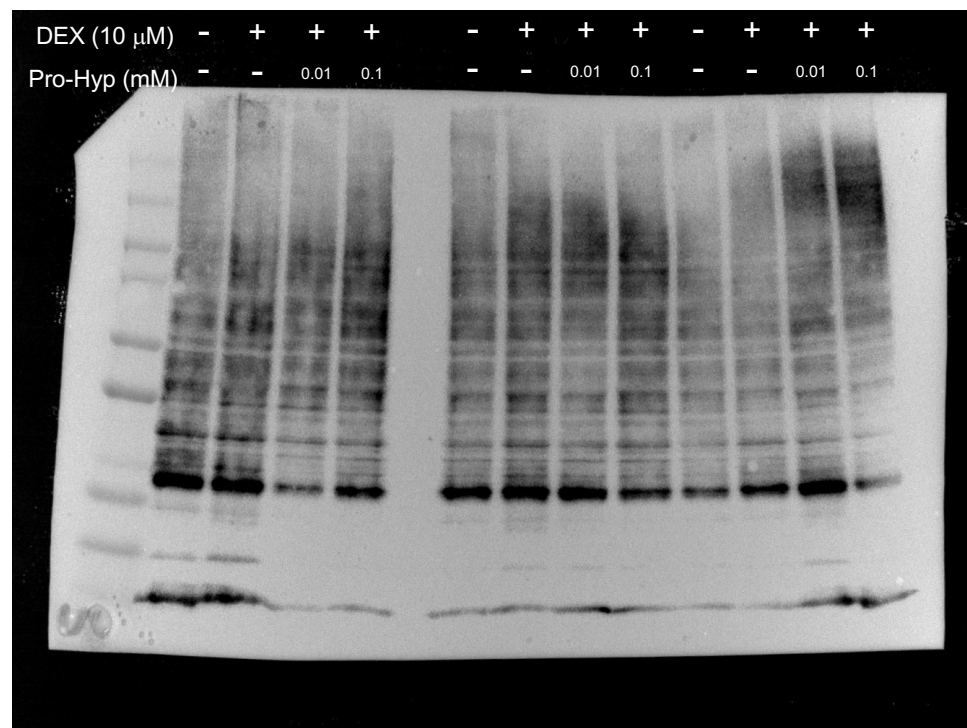

Figure 3A 4A  $\beta$ -actin

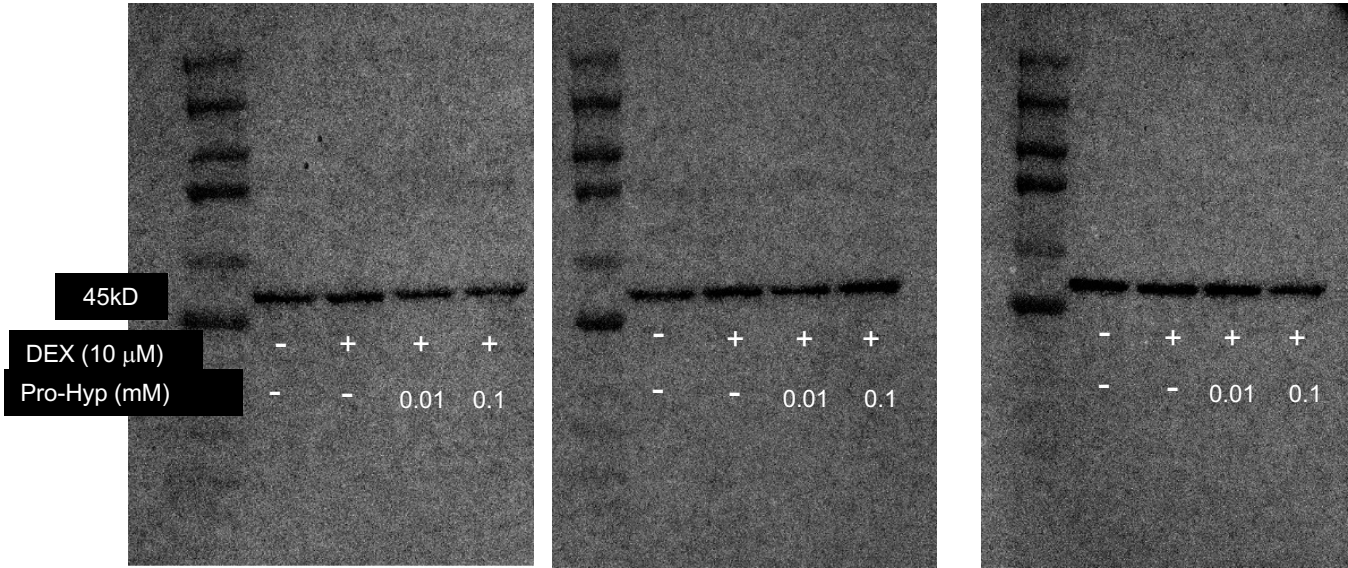

Figure 4A p-Akt

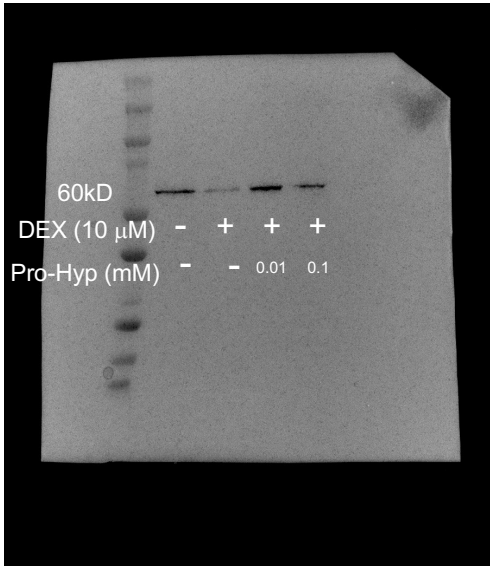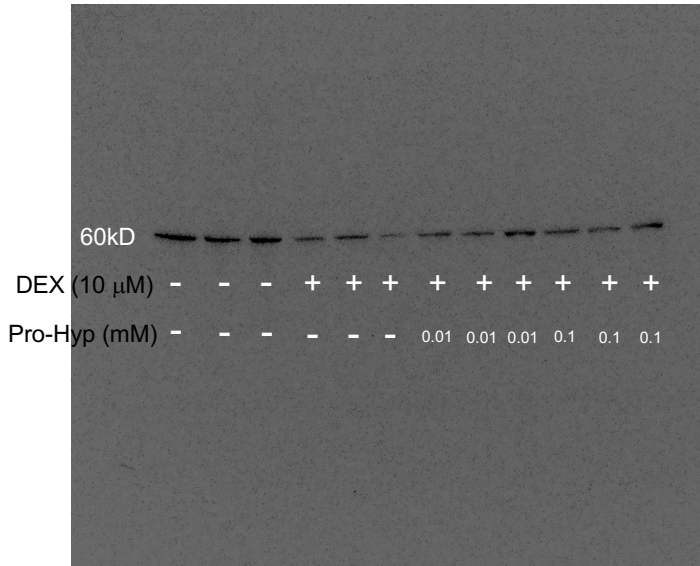

**Figure 4A Akt**

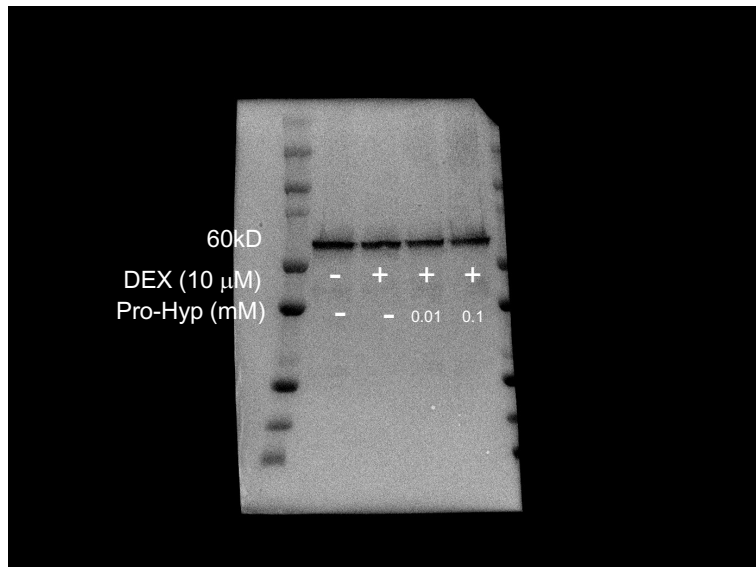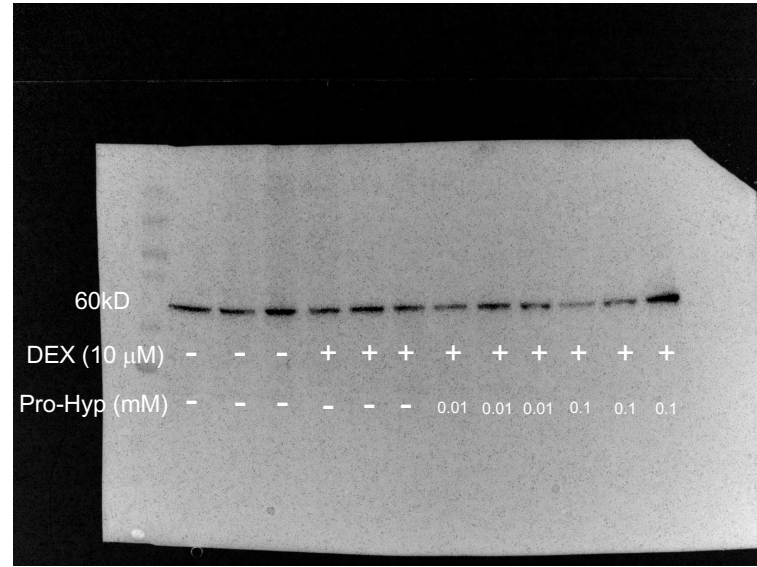

**Figure 4A p-mTOR**

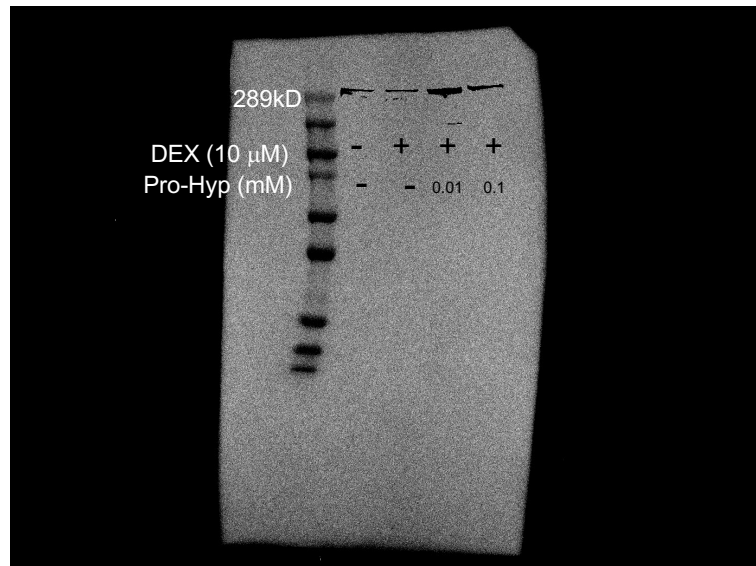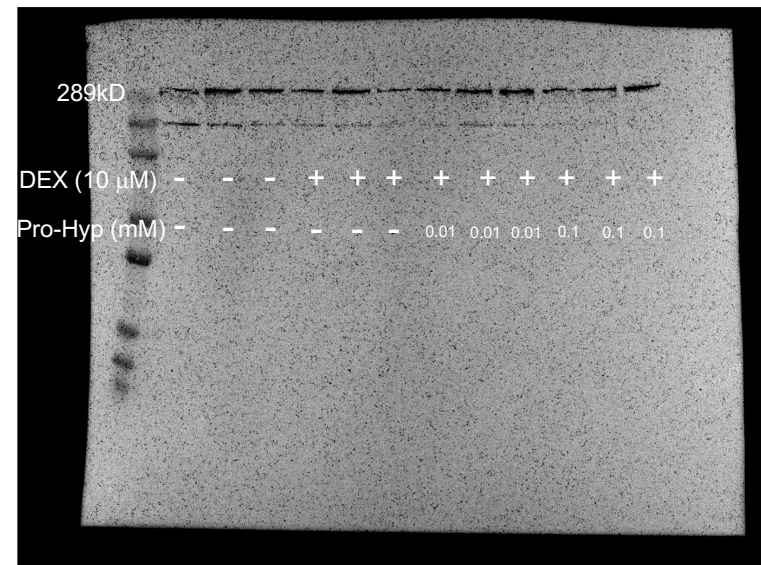

**Figure 4A mTOR**

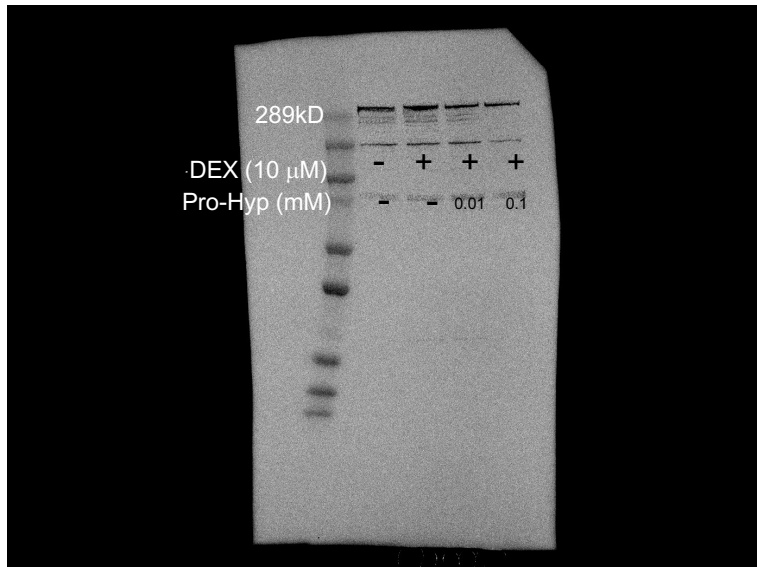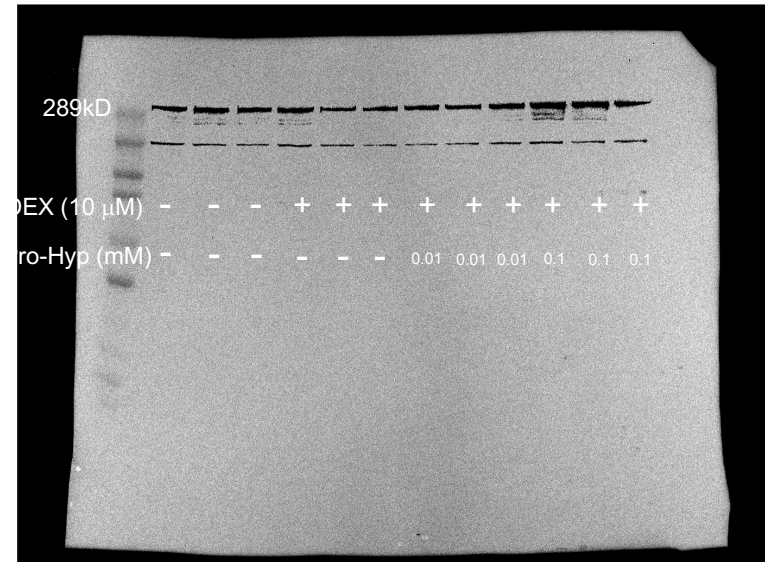



**Figure 4A p-Foxo3a**

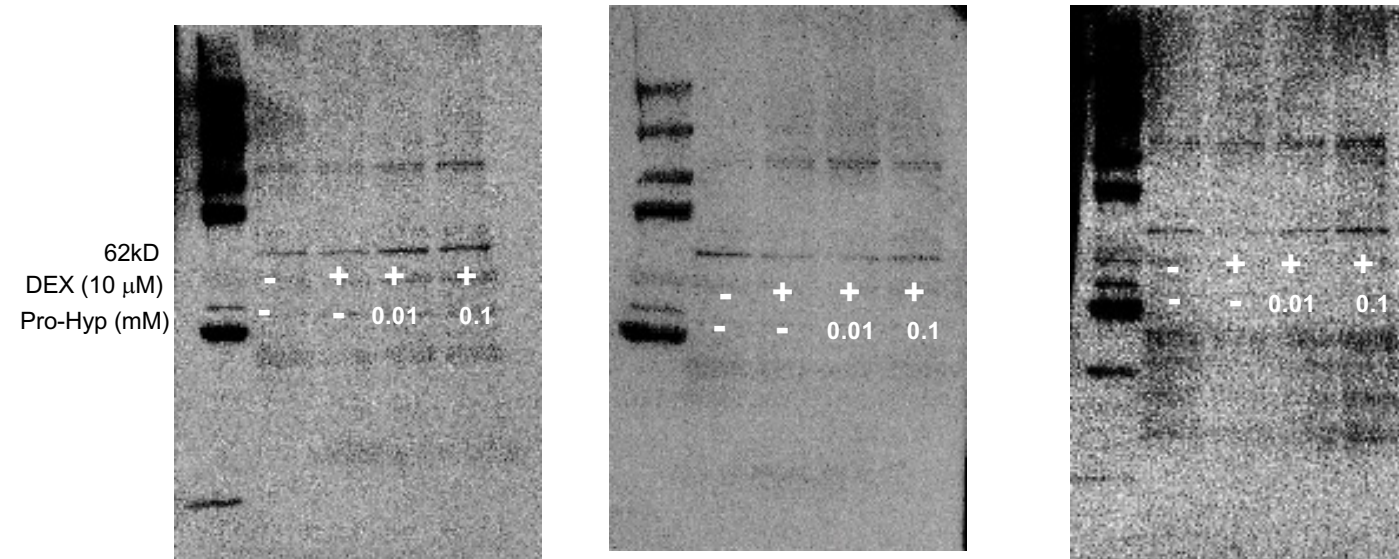

**Figure 4A Foxo3a**

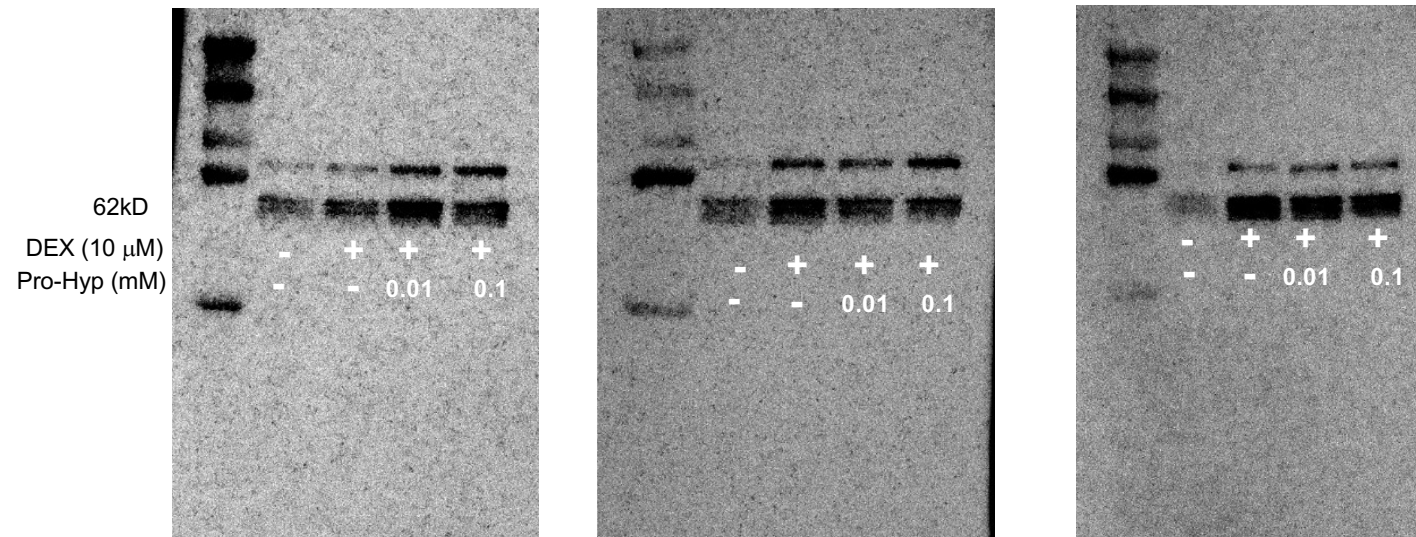

Supplement: s1 [file s1]
